# Supplementary material
Source: Springer Nature journal article supplement (https://www.springermedizin.de/resource/supplementary/12931_2013_1472_MOESM2_ESM.pdf/9426242)

A.

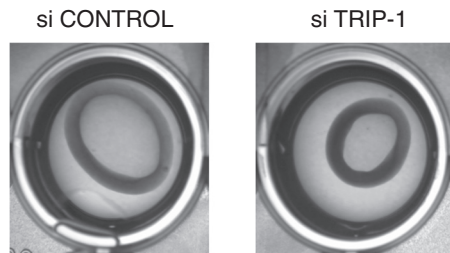

C.

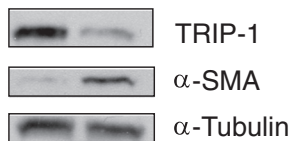

si CONTROL

+

si TRIP-1

+

D.

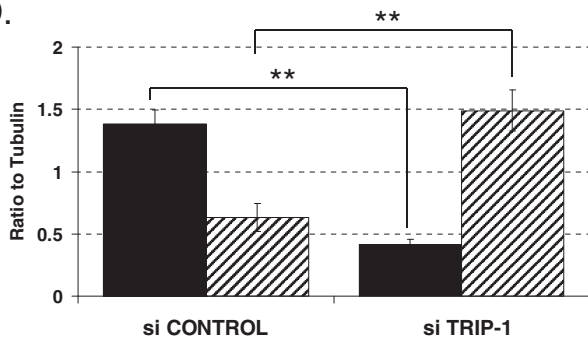

B.

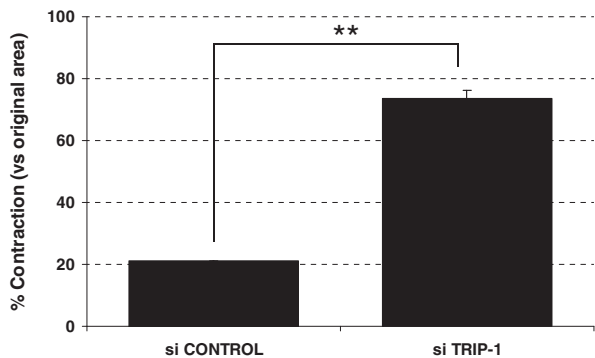

E.

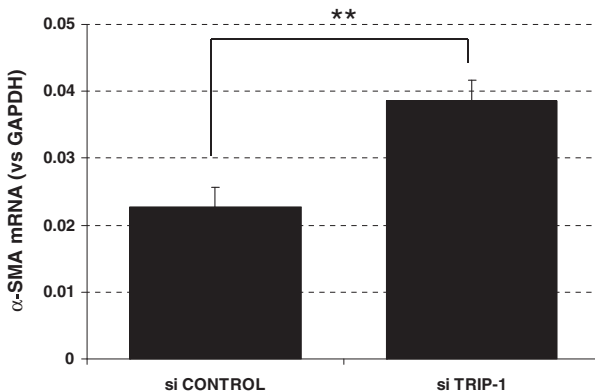

Supplement: MOESM2 [file 9426242]
